# Supplementary material
Source: PubMed Central journal article supplement (PMC5161629)
Supplement: NIHMS825831-supplement-SI.pdf [file NIHMS825831-supplement-SI.pdf]

Supporting information:

# Guide Strand 3'-End Modifications Regulate siRNA Specificity

Rachel Valenzuela, Kazumitsu Onizuka, Alexi A. Ball-Jones, Tiannan Hu, Scott Suter and Peter A. Beal \*

Department of Chemistry, University of California, Davis, One Shields Ave, Davis, California (USA) 95616

## **Contents of Supporting Information:**

|                                                                                               |       |
|-----------------------------------------------------------------------------------------------|-------|
| <u><sup>1</sup>H NMR for Compound 2</u> .....                                                 | S2    |
| <u><sup>13</sup>C NMR for Compound 2</u> .....                                                | S3    |
| <u>Plots of changes in fluorescence polarization vs [hAgo2 PAZ] for different siRNA</u> ..... | S4-S8 |
| <u>Supporting Figure 1</u> .....                                                              | S9    |

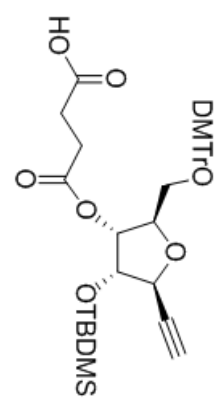

K0461-2  
Automation directory:  
Sample : K0461-2  
Pulse Sequence: s2pul  
Solvent: cd2cl2  
Temp: 22.0 C / 295.1 K  
Operator: beal  
Mercury-300HS "localhost.localdomain"

Relax. delay 1.000 sec  
Pulse 45.0 degrees  
Acq. time 1.997 sec  
Width 4800.8 Hz  
8 repetitions  
OBSERVE H1, 300.0467759 MHz  
DATA PROCESSING  
Line broadening 0.2 Hz  
F2 size 32768  
Total time 0 min, 34 sec

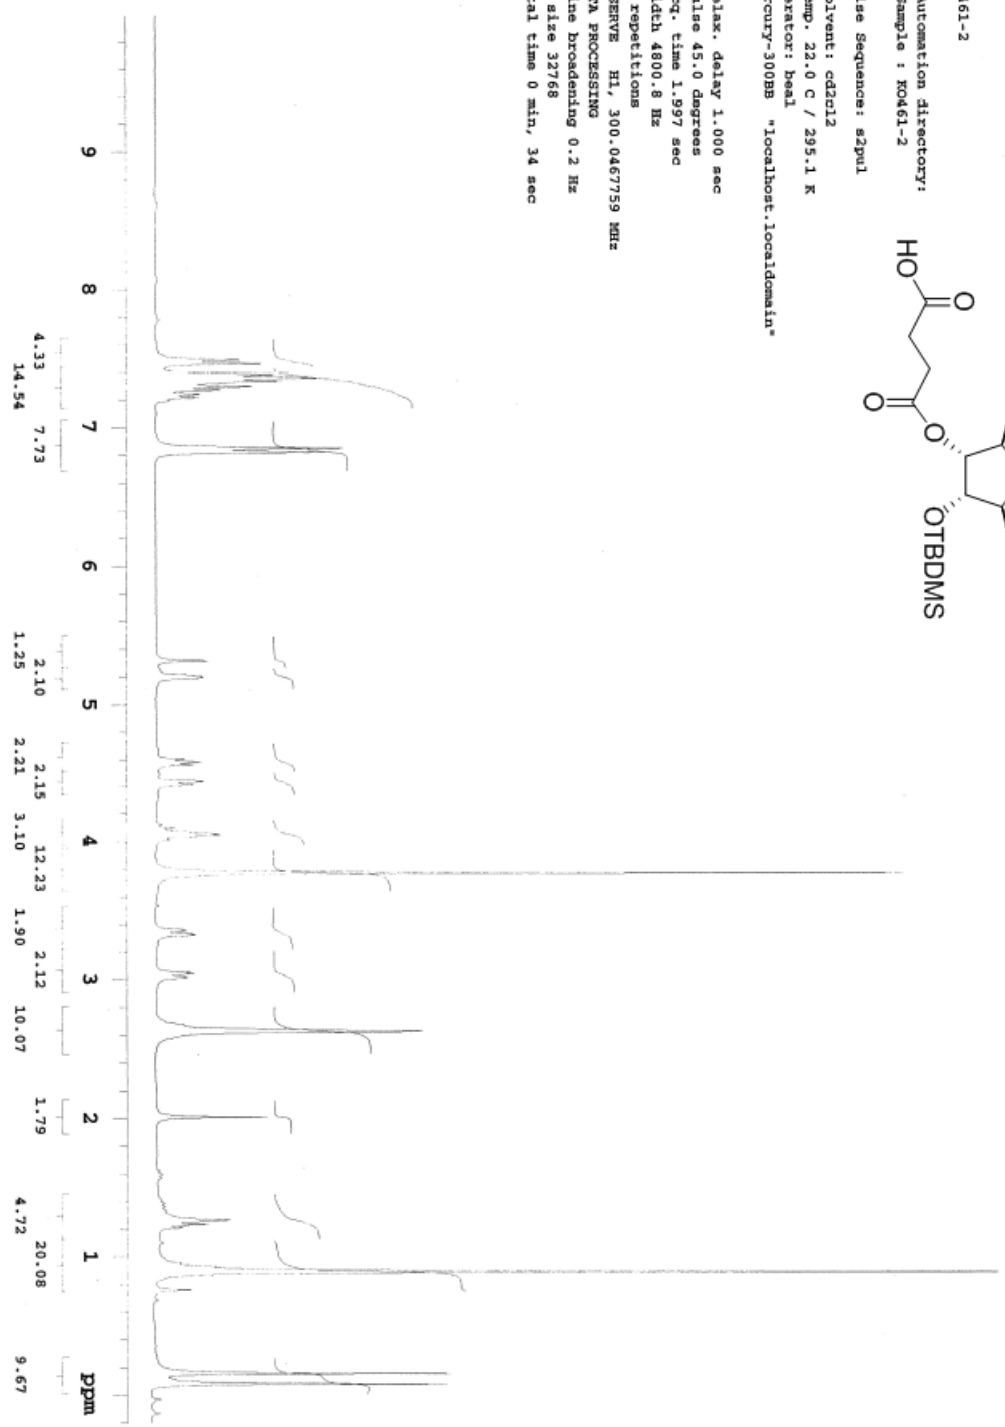

K0461-2

Automation directory:  
Sample : K0461-2

Pulse Sequence: szpul

Solvent: c13cl2

Temp. 22.0 C / 295.1 K

Operator: baal

Mercury-300WB "localhost:localdomain"

Relax. delay 1.000 sec

Pulse 45.0 degrees

Acq. time 1.300 sec

Width 19607.8 Hz

2336 repetitions

ORIGINE C13, 75.4467897 MHz

PROCPAR ML, 300.0483110 MHz

Power 40 dB

continuously on

WALTZ-16 modulated

DATA PROCESSING

Line broadening 1.0 Hz

FT size 65536

Total time 3 hr, 22 min, 56 sec

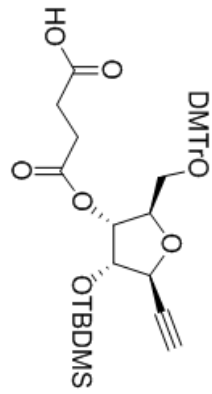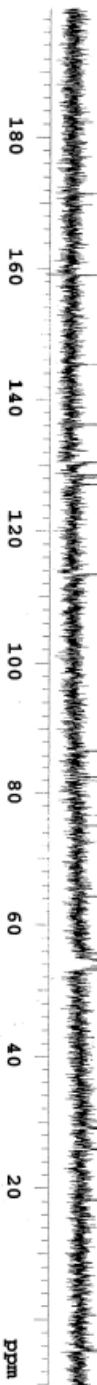

1-ER Position 20

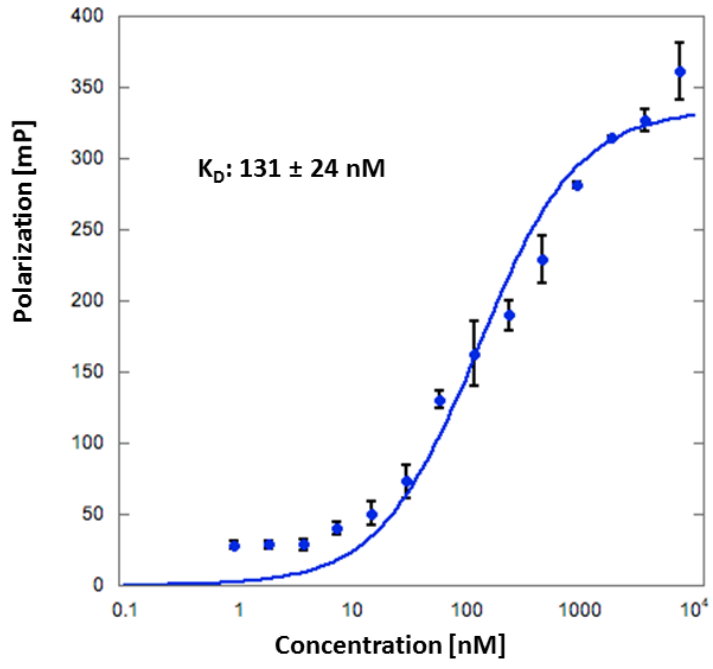

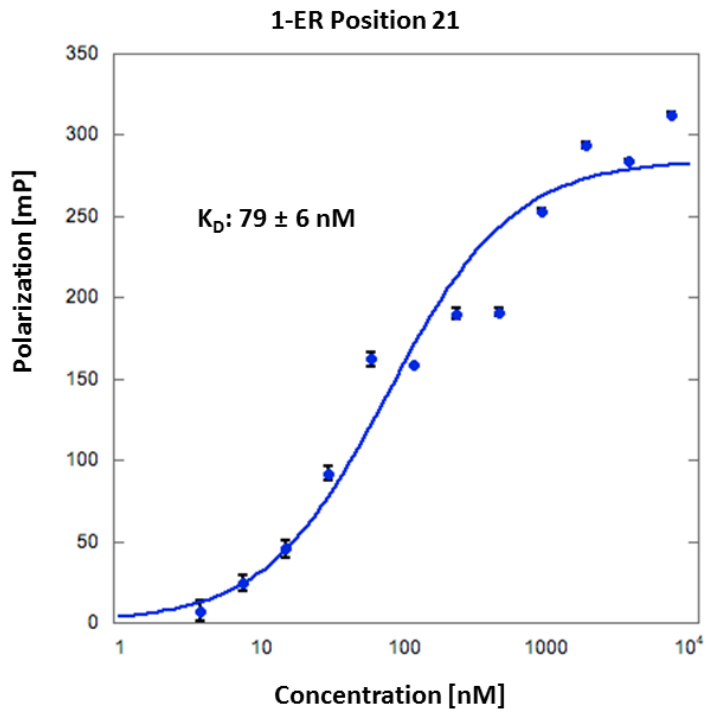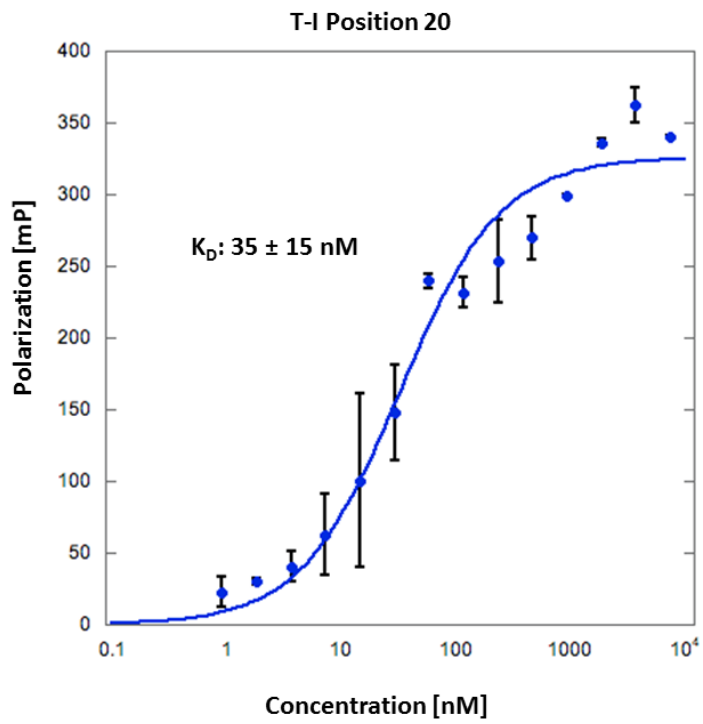

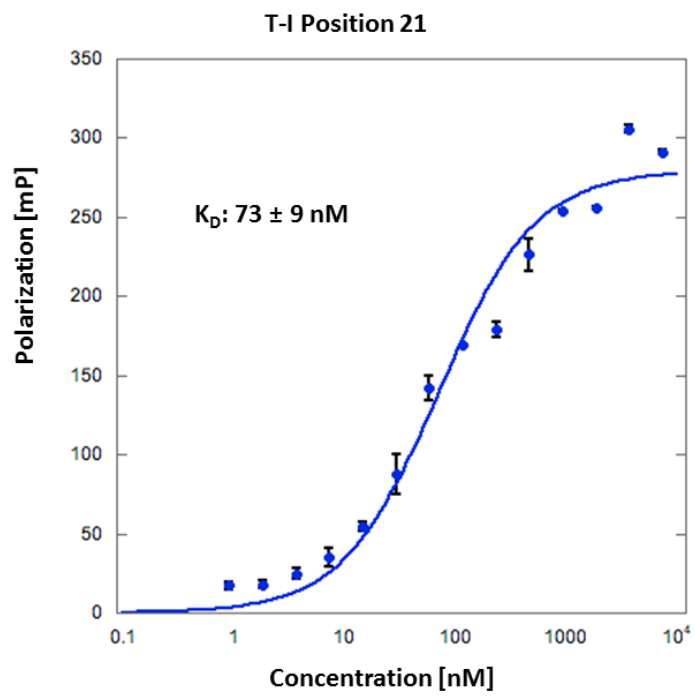

T-II Position 20

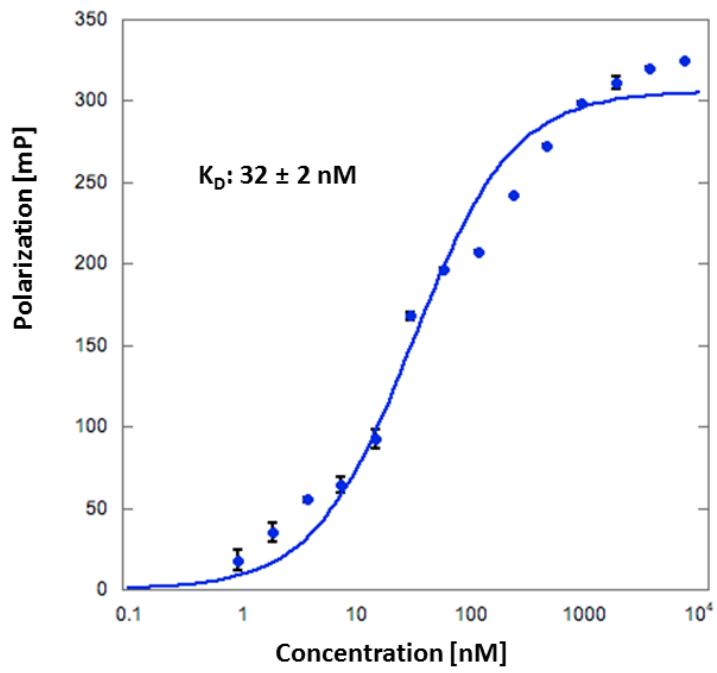

T-II Position 21

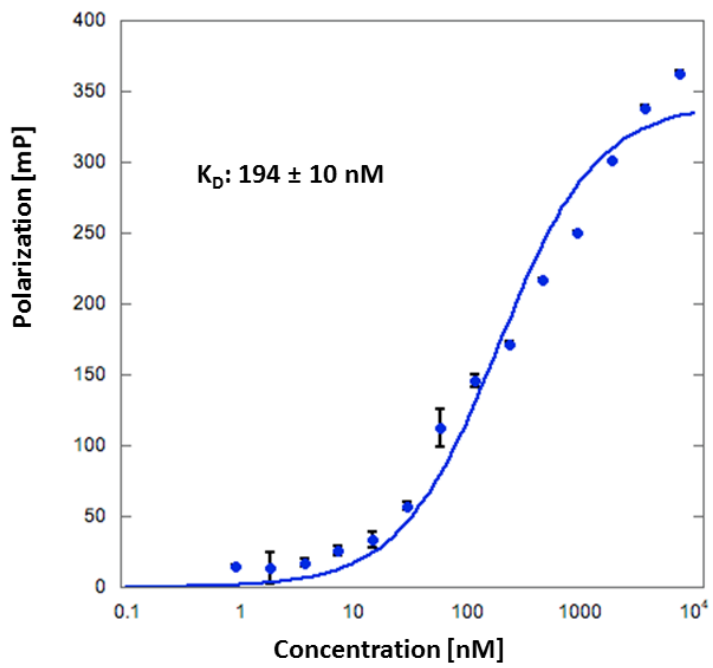

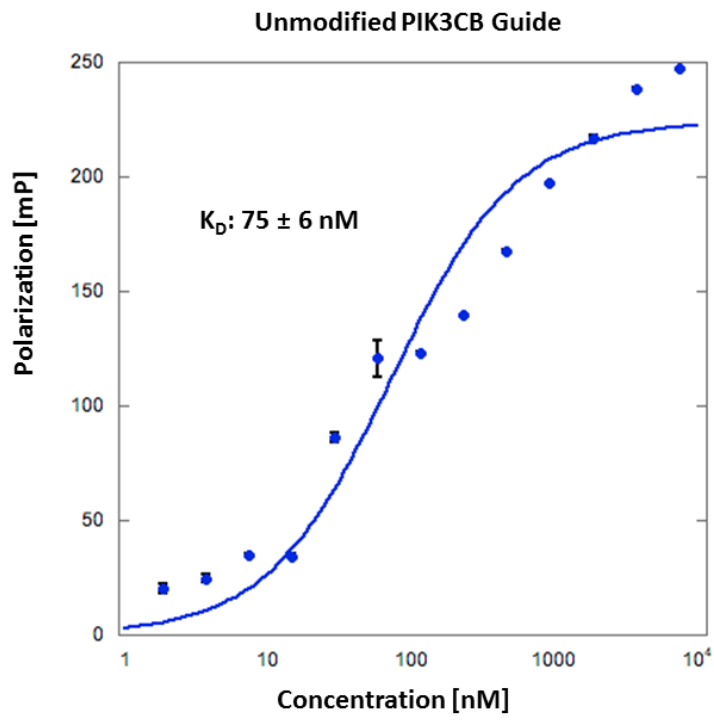



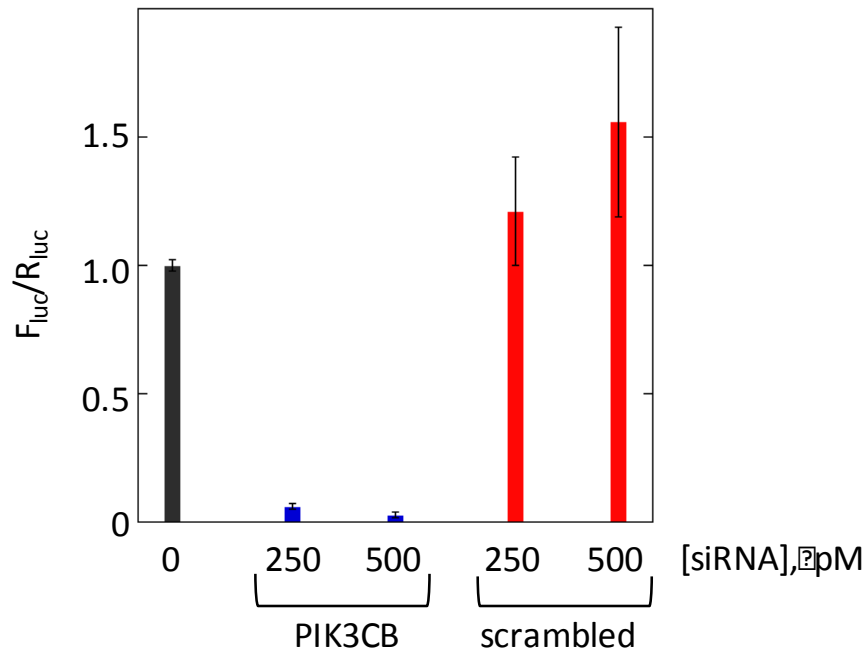

**Supporting Figure 1:** Knockdown activity of unmodified PIK3CB siRNA compared to a scrambled sequence control. RNAi activity was determined in HeLa cells with the PIK3CB luciferase reporter plasmid as described in the Materials and Methods section. Scrambled sequence siRNA: guide: 5'-p-gaaugguacguaauuauaug-3', passenger: 3'-cacuaucgaugcauuauau-5'
